# Supplementary material
Source: HighWire-hosted journal article supplement (https://www.cmajopen.ca/highwire/filestream/80728/field_highwire_adjunct_files/0/open-2013-0009-1-at.pdf)
Supplement: open-2013-0009-1-at.pdf [file open-2013-0009-1-at.pdf]

# Appendix 1: Survey of principal investigators to investigate possible reasons for differences in the uptake of treatment for hepatitis C virus between centres

HCV
Exit this survey

**1. Demographic attributes**

Name of Hospital/Clinic

Number of years you have been in practice

Primary care Physician or Specialist (if specialist, which specialty)

**2. Please specify the description that best fits the population served by your clinical practice/hospital.**

Tertiary care hospital

Primary care hospital

Primary care public clinic

Primary care private clinic

**3. Number of Physicians**

How many physicians work at the clinic

Number of physicians treating HCV

**4. Approximately what proportion of patients seen at your clinic have HCV?**

|                   | <5%                   | 6-10%                 | 11-25%                | 25-50%                | 51-75%                | 76-100%               |
|-------------------|-----------------------|-----------------------|-----------------------|-----------------------|-----------------------|-----------------------|
| HCV Mono-Infected | <input type="radio"/> | <input type="radio"/> | <input type="radio"/> | <input type="radio"/> | <input type="radio"/> | <input type="radio"/> |
| HIV-HCV coinfectd | <input type="radio"/> | <input type="radio"/> | <input type="radio"/> | <input type="radio"/> | <input type="radio"/> | <input type="radio"/> |

**5. Do you have access to the following tests/specialists?**

|                                    | Yes                   | No                    |
|------------------------------------|-----------------------|-----------------------|
| Qualitative HCV PCR                | <input type="radio"/> | <input type="radio"/> |
| HCV Viral load measurement         | <input type="radio"/> | <input type="radio"/> |
| HCV genotyping                     | <input type="radio"/> | <input type="radio"/> |
| Transient Elastography (FibroScan) | <input type="radio"/> | <input type="radio"/> |
| Liver Biopsy                       | <input type="radio"/> | <input type="radio"/> |

Other (please specify)

**8. How important are the following criteria in determining the eligibility for treatment?**

|                                    | Less Important        | Important             | Very Important        |
|------------------------------------|-----------------------|-----------------------|-----------------------|
| Age                                | <input type="radio"/> | <input type="radio"/> | <input type="radio"/> |
| Gender                             | <input type="radio"/> | <input type="radio"/> | <input type="radio"/> |
| HCV Genotype                       | <input type="radio"/> | <input type="radio"/> | <input type="radio"/> |
| Severity of Fibrosis               | <input type="radio"/> | <input type="radio"/> | <input type="radio"/> |
| Past Psychiatric Co-morbidities    | <input type="radio"/> | <input type="radio"/> | <input type="radio"/> |
| Current Psychiatric Co-morbidities | <input type="radio"/> | <input type="radio"/> | <input type="radio"/> |
| Current Incarceration              | <input type="radio"/> | <input type="radio"/> | <input type="radio"/> |
| Past Incarceration                 | <input type="radio"/> | <input type="radio"/> | <input type="radio"/> |
| Past IDU                           | <input type="radio"/> | <input type="radio"/> | <input type="radio"/> |
| Current IDU                        | <input type="radio"/> | <input type="radio"/> | <input type="radio"/> |
| Past Alcohol intake                | <input type="radio"/> | <input type="radio"/> | <input type="radio"/> |
| Current Alcohol Intake             | <input type="radio"/> | <input type="radio"/> | <input type="radio"/> |
| Past HCV treatment                 | <input type="radio"/> | <input type="radio"/> | <input type="radio"/> |
| History of re-infection HCV        | <input type="radio"/> | <input type="radio"/> | <input type="radio"/> |
| Potential to become re-infected    | <input type="radio"/> | <input type="radio"/> | <input type="radio"/> |

**9. In your experience, what percentage of patients offered treatment refuse to initiate HCV treatment?**

|                      | 0-20%                 | 21-40%                | 41-60%                | 61-80%                | 81-100%               |
|----------------------|-----------------------|-----------------------|-----------------------|-----------------------|-----------------------|
| Refuse HCV treatment | <input type="radio"/> | <input type="radio"/> | <input type="radio"/> | <input type="radio"/> | <input type="radio"/> |

**10. What reasons do eligible patients who refuse treatment give? Please tick all that apply.**

|                                           | Yes                      | No                       |
|-------------------------------------------|--------------------------|--------------------------|
| Refusal to modify chaotic lifestyle       | <input type="checkbox"/> | <input type="checkbox"/> |
| Lack of belief in treatment effectiveness | <input type="checkbox"/> | <input type="checkbox"/> |

|                                              | Yes                   | No                    |
|----------------------------------------------|-----------------------|-----------------------|
| Hepatologist /GI                             | <input type="radio"/> | <input type="radio"/> |
| Nephrologist                                 | <input type="radio"/> | <input type="radio"/> |
| Psychiatrist/psychologist                    | <input type="radio"/> | <input type="radio"/> |
| Social worker                                | <input type="radio"/> | <input type="radio"/> |
| Clinical Pharmacist                          | <input type="radio"/> | <input type="radio"/> |
| Dedicated HCV nurse                          | <input type="radio"/> | <input type="radio"/> |
| Industry Sponsored Nurse/S worker            | <input type="radio"/> | <input type="radio"/> |
| Dedicated HCV Social worker                  | <input type="radio"/> | <input type="radio"/> |
| Out Reach Team for patients with Hepatitis C | <input type="radio"/> | <input type="radio"/> |
| Addiction services                           | <input type="radio"/> | <input type="radio"/> |
| Methadone/suboxone                           | <input type="radio"/> | <input type="radio"/> |

**6. HCV management**

|                                                                                         | Yes                   | No                    |
|-----------------------------------------------------------------------------------------|-----------------------|-----------------------|
| Do you personally treat patients with Hepatitis C?                                      | <input type="radio"/> | <input type="radio"/> |
| Do you refer patients with Hepatitis C to colleagues for further opinion or management? | <input type="radio"/> | <input type="radio"/> |

**7. In what circumstances do you refer to colleagues**

|                                                     | Yes                      | No                       |
|-----------------------------------------------------|--------------------------|--------------------------|
| For treatment                                       | <input type="checkbox"/> | <input type="checkbox"/> |
| For follow up                                       | <input type="checkbox"/> | <input type="checkbox"/> |
| For complex clinical issues relating to Hepatitis C | <input type="checkbox"/> | <input type="checkbox"/> |
| For joint management e.g. with psychiatry           | <input type="checkbox"/> | <input type="checkbox"/> |
| For transplantation                                 | <input type="checkbox"/> | <input type="checkbox"/> |

|                                                       | Yes                      | No                       |
|-------------------------------------------------------|--------------------------|--------------------------|
| Concern over adverse drug reactions                   | <input type="checkbox"/> | <input type="checkbox"/> |
| Inconvenient to start treatment due to work pressures | <input type="checkbox"/> | <input type="checkbox"/> |
| Lack of concern over future                           | <input type="checkbox"/> | <input type="checkbox"/> |
| Waiting for new treatment options                     | <input type="checkbox"/> | <input type="checkbox"/> |

Other (please specify)

Powered by [SurveyMonkey](#)  
Check out our [sample surveys](#) and create your own now!
